# Supplementary material for: Diagnostic performance of salivary pepsin for gastroesophageal reflux disease
Source: Oxford University Press journal article supplement (doi:10.1093/dote/doaa117), 2020-11-12
Supplement: supplementary_table_doaa117.docx [file supplementary_table_doaa117.docx]

| **Supplemental Table 1. Pair-Wise P-Value Comparisons of Pepsin Concentration by Sub-Group** | | | | | |
| --- | --- | --- | --- | --- | --- |
| **Subgroup** | **Mean (SD) Pepsin Concentration** | **BE** | **Control** | **ERD** | **Functional HB** |
| BE | 72.7 (70.2) | - | - | - | - |
| Control | 17.9 (31.4) | <0.001 | - | - | - |
| ERD | 101.1 (80.6) | 0.24 | 0.002 | - | - |
| Functional HB | 22.9 (31.7) | <0.001 | 0.68 | <0.001 | - |
| NERD | 53.7 (51.3) | 0.24 | 0.03 | 0.07 | 0.05 |

| **Supplemental Table 2. Performance Characteristics in Phase 1** | | |
| --- | --- | --- |
| **Salivary Pepsin Threshold (ng/mL)** | **Sensitivity** | **Specificity** |
| >15 | 75.0% | 56.7% |
| >24.95 | 71.4% | 66.7% |
| >25 | 63.1% | 73.3% |
| >50 | 51.2% | 80.0% |
| >70.2 | 47.6% | 93.3% |
| >100 | 33.3% | 93.3% |
